# Supplementary material for: Interplay of kinetochores and catalysts drives rapid assembly of the mitotic checkpoint complex
Source: Springer Nature journal article supplement (doi:10.1038/s41467-025-59970-1), 2025-05-23
Supplement: MOESM1 [file 41467_2025_59970_MOESM1_ESM.pdf]

**Table 1** *Concentration of species used in MCC assembly assays*

| Panel | Curve       | MCC (CDC20)* | MPS1  | M1:M2  | B1:B3  | Catalyst-(P)? | <sup>R</sup> KT (wt or mutant) | <sup>R</sup> KT-(P) (wt or mutant) | Rapamycin | ATP  |
|-------|-------------|--------------|-------|--------|--------|---------------|--------------------------------|------------------------------------|-----------|------|
| 4B    | Blue        | 500 nM       | 50 nM | 100 nM | 100 nM | Yes           | /                              | 20 nM                              | 200 nM    | 2 mM |
|       | Red         | 500 nM       | 50 nM | 100 nM | 100 nM | Yes           | /                              | /                                  | 200 nM    | 2 mM |
| 4C    | Light brown | 100 nM       | 50 nM | 100 nM | 100 nM | Yes           | /                              | /                                  | 200 nM    | 2 mM |
|       | Light blue  | 100 nM       | 50 nM | 40 nM  | 40 nM  | Yes           | /                              | /                                  | 200 nM    | 2 mM |
|       | Green       | 100 nM       | 50 nM | 20 nM  | 40 nM  | Yes           | /                              | /                                  | 200 nM    | 2 mM |
|       | Violet      | 100 nM       | 50 nM | 20 nM  | 20 nM  | Yes           | /                              | /                                  | 200 nM    | 2 mM |
|       | Teal        | 100 nM       | 50 nM | 10 nM  | 10 nM  | Yes           | /                              | /                                  | 200 nM    | 2 mM |
| 4D    | Blue        | 100 nM       | 50 nM | 20 nM  | 40 nM  | No            | 20 nM                          | /                                  | 200 nM    | 2 mM |
|       | Green       | 100 nM       | 50 nM | 20 nM  | 40 nM  | No            | 20 nM                          | /                                  | /         | 2 mM |
|       | Grey        | 100 nM       | 50 nM | 20 nM  | 40 nM  | No            | /                              | /                                  | 200 nM    | 2 mM |
| 4F    | Blue        | 100 nM       | 50 nM | 20 nM  | 40 nM  | No            | 20 nM                          | /                                  | 200 nM    | 2 mM |
|       | Green       | 100 nM       | 50 nM | 20 nM  | 40 nM  | No            | 20 nM                          | /                                  | 200 nM    | 2 mM |
|       | Grey        | 100 nM       | 50 nM | 20 nM  | 40 nM  | No            | /                              | /                                  | 200 nM    | 2 mM |
|       | Violet      | 100 nM       | 50 nM | 20 nM  | 40 nM  | No            | 20 nM                          | /                                  | 200 nM    | 2 mM |
| 5C    | Blue        | 100 nM       | 50 nM | 20 nM  | 40 nM  | No            | 20 nM                          | /                                  | 200 nM    | 2 mM |
|       | Pea         | 100 nM       | 50 nM | 20 nM  | 40 nM  | No            | 20 nM                          | /                                  | 200 nM    | 2 mM |
|       | Brown       | 100 nM       | 50 nM | 20 nM  | 40 nM  | No            | 20 nM                          | /                                  | 200 nM    | 2 mM |
| 5D    | Blue        | 100 nM       | 50 nM | 20 nM  | 40 nM  | No            | 20 nM                          | /                                  | 200 nM    | 2 mM |
|       | Orange      | 100 nM       | 50 nM | 20 nM  | 40 nM  | No            | 20 nM                          | /                                  | 200 nM    | 2 mM |
|       | Purple      | 100 nM       | 50 nM | 20 nM  | 40 nM  | No            | 20 nM                          | /                                  | 200 nM    | 2 mM |
|       | Grey        | 100 nM       | 50 nM | 20 nM  | 40 nM  | No            | /                              | /                                  | 200 nM    | 2 mM |
| 6D    | Blue        | 100 nM       | 50 nM | 20 nM  | 40 nM  | No            | 20 nM                          | /                                  | 200 nM    | 2 mM |
|       | Purple      | 100 nM       | 50 nM | 20 nM  | 40 nM  | No            | 20 nM                          | /                                  | 200 nM    | 2 mM |
|       | Light brown | 100 nM       | 50 nM | 20 nM  | 40 nM  | No            | /                              | /                                  | 200 nM    | 2 mM |
|       | Pink        | 100 nM       | 50 nM | 20 nM  | 40 nM  | No            | /                              | /                                  | 200 nM    | 2 mM |
| 6E    | Blue        | 100 nM       | 50 nM | 20 nM  | 40 nM  | No            | 20 nM                          | /                                  | 200 nM    | 2 mM |
|       | Brown       | 100 nM       | 50 nM | 20 nM  | 40 nM  | No            | 20 nM                          | /                                  | 200 nM    | 2 mM |
|       | Light brown | 100 nM       | 50 nM | 20 nM  | 40 nM  | No            | /                              | /                                  | 200 nM    | 2 mM |
|       | Teal        | 100 nM       | 50 nM | 20 nM  | 40 nM  | No            | /                              | /                                  | 200 nM    | 2 mM |
| 6F    | Blue        | 100 nM       | 50 nM | 20 nM  | 40 nM  | No            | 20 nM                          | /                                  | 200 nM    | 2 mM |
|       | Light blue  | 100 nM       | 50 nM | 20 nM  | 40 nM  | No            | 20 nM                          | /                                  | 200 nM    | 2 mM |
|       | Light brown | 100 nM       | 50 nM | 20 nM  | 40 nM  | No            | /                              | /                                  | 200 nM    | 2 mM |
|       | Dark pink   | 100 nM       | 50 nM | 20 nM  | 40 nM  | No            | /                              | /                                  | 200 nM    | 2 mM |
| 7A    | Blue        | 100 nM       | 50 nM | 20 nM  | 40 nM  | No            | 20 nM                          | /                                  | 200 nM    | 2 mM |
|       | Grey        | 100 nM       | /     | 20 nM  | 40 nM  | No            | 20 nM                          | /                                  | 200 nM    | 2 mM |
|       | Brown       | 100 nM       | 50 nM | 20 nM  | 40 nM  | No            | 20 nM                          | /                                  | 200 nM    | 2 mM |
| 7C    | Blue        | 100 nM       | 50 nM | 20 nM  | 40 nM  | No            | 20 nM                          | /                                  | 200 nM    | 2 mM |
|       | Green       | 100 nM       | 50 nM | 20 nM  | 40 nM  | No            | 20 nM                          | /                                  | 200 nM    | 2 mM |
|       | Purple      | 100 nM       | 50 nM | 20 nM  | 40 nM  | No            | 20 nM                          | /                                  | 200 nM    | 2 mM |
|       | Yellow      | 100 nM       | 50 nM | 20 nM  | 40 nM  | No            | 20 nM                          | /                                  | 200 nM    | 2 mM |
|       | Grey        | 100 nM       | /     | 20 nM  | 40 nM  | No            | 20 nM                          | /                                  | 200 nM    | 2 mM |
| S1F   | Blue        | 500 nM       | 50 nM | 100 nM | 100 nM | Yes           | /                              | 20 nM                              | 200 nM    | 2 mM |
|       | Grey        | 500 nM       | 50 nM | 100 nM | 100 nM | Yes           | /                              | 20 nM                              | 200 nM    | 2 mM |
|       | Black       | 500 nM       | 50 nM | 100 nM | 100 nM | Yes           | /                              | /                                  | 200 nM    | 2 mM |
| S1G   | Blue        | 100 nM       | 50 nM | 100 nM | 100 nM | No            | 20 nM                          | /                                  | 200 nM    | 2 mM |
|       | Orange      | 100 nM       | 50 nM | 100 nM | 100 nM | No            | 20 nM                          | /                                  | 200 nM    | /    |
|       | Grey        | 100 nM       | 50 nM | 100 nM | 100 nM | No            | /                              | /                                  | 200 nM    | 2 mM |
| S1H   | Purple      | 100 nM       | 50 nM | 100 nM | 100 nM | Yes           | /                              | 20 nM                              | 200 nM    | 2 mM |

|       |                                   |        |       |        |        |     |       |       |        |      |
|-------|-----------------------------------|--------|-------|--------|--------|-----|-------|-------|--------|------|
|       | Green                             | 100 nM | 50 nM | 100 nM | 100 nM | Yes | 20 nM | /     | 200 nM | 2 mM |
|       | Light blue                        | 100 nM | 50 nM | 100 nM | 100 nM | No  | /     | 20 nM | 200 nM | 2 mM |
|       | Blue                              | 100 nM | 50 nM | 100 nM | 100 nM | No  | 20 nM | /     | 200 nM | 2 mM |
|       | Black                             | 100 nM | 50 nM | 100 nM | 100 nM | Yes | /     | /     | 200 nM | 2 mM |
|       | Grey                              | 100 nM | 50 nM | 100 nM | 100 nM | No  | /     | /     | 200 nM | 2 mM |
|       |                                   |        |       |        |        |     |       |       |        |      |
| S2A   | Dark red                          | 100 nM | 50 nM | 20 nM  | 40 nM  | No  | 20 nM | /     | /      | 2 mM |
|       | Grey                              | 100 nM | 50 nM | 20 nM  | 40 nM  | No  | 20 nM | /     | /      | 2 mM |
|       | Pink                              | 100 nM | 50 nM | 20 nM  | 40 nM  | No  | 20 nM | /     | /      | 2 mM |
|       |                                   |        |       |        |        |     |       |       |        |      |
| S2B   | Dark red                          | 100 nM | 50 nM | 20 nM  | 40 nM  | No  | 20 nM | /     | /      | 2 mM |
|       | Green                             | 100 nM | 50 nM | 20 nM  | 40 nM  | No  | /     | /     | /      | 2 mM |
|       | Black                             | 100 nM | 50 nM | 20 nM  | 40 nM  | No  | 20 nM | /     | /      | 2 mM |
|       | Light brown                       | 100 nM | 50 nM | 20 nM  | 40 nM  | No  | 20 nM | /     | /      | 2 mM |
|       |                                   |        |       |        |        |     |       |       |        |      |
| S2C-G | See relevant parameters in Figure |        |       |        |        |     |       |       |        |      |
|       |                                   |        |       |        |        |     |       |       |        |      |
| S3C** | Blue                              | 100 nM | 50 nM | 20 nM  | 40 nM  | No  | 20 nM | /     | 200 nM | 2 mM |
|       | Purple                            | 100 nM | 50 nM | 20 nM  | 40 nM  | No  | 20 nM | /     | 200 nM | 2 mM |
|       | Grey                              | 100 nM | 50 nM | 20 nM  | 40 nM  | No  | /     | /     | 200 nM | 2 mM |
|       | Green                             | 100 nM | 50 nM | 20 nM  | 40 nM  | No  | 20 nM | /     | /      | 2 mM |
|       | Pink                              | 100 nM | 50 nM | 20 nM  | 40 nM  | No  | 20 nM | /     | /      | 2 mM |
|       | Light blue                        | 100 nM | 50 nM | 20 nM  | 40 nM  | No  | /     | /     | /      | 2 mM |
|       |                                   |        |       |        |        |     |       |       |        |      |
| S4E   | Dark blue                         | 100 nM | 50 nM | 20 nM  | 40 nM  | No  | 20 nM | /     | 200 nM | 2 mM |
|       | Purple                            | 100 nM | 50 nM | 20 nM  | 40 nM  | No  | 20 nM | /     | 200 nM | 2 mM |
|       | Light blue                        | 100 nM | 50 nM | 20 nM  | 40 nM  | No  | /     | /     | 200 nM | 2 mM |
|       | Green                             | 100 nM | 50 nM | 20 nM  | 40 nM  | No  | /     | /     | 200 nM | 2 mM |
|       |                                   |        |       |        |        |     |       |       |        |      |
| S4F   | Dark blue                         | 100 nM | 50 nM | 20 nM  | 40 nM  | No  | 20 nM | /     | 200 nM | 2 mM |
|       | Grey                              | 100 nM | 50 nM | 20 nM  | 40 nM  | No  | 20 nM | /     | 200 nM | 2 mM |
|       | Light blue                        | 100 nM | 50 nM | 20 nM  | 40 nM  | No  | /     | /     | 200 nM | 2 mM |
|       | Salmon                            | 100 nM | 50 nM | 20 nM  | 40 nM  | No  | /     | /     | 200 nM | 2 mM |
|       |                                   |        |       |        |        |     |       |       |        |      |
| S4G   | Dark blue                         | 100 nM | 50 nM | 20 nM  | 40 nM  | No  | 20 nM | /     | 200 nM | 2 mM |
|       | Orange                            | 100 nM | 50 nM | 20 nM  | 40 nM  | No  | 20 nM | /     | 200 nM | 2 mM |
|       | Light blue                        | 100 nM | 50 nM | 20 nM  | 40 nM  | No  | /     | /     | 200 nM | 2 mM |
|       | Pink                              | 100 nM | 50 nM | 20 nM  | 40 nM  | No  | /     | /     | 200 nM | 2 mM |

\*MAD2 and BUBR1 concentration were held at the fixed concentrations of 100 nM each in all experiments

\*\*CCAN added at a concentration of 10 nM as indicated in Figure

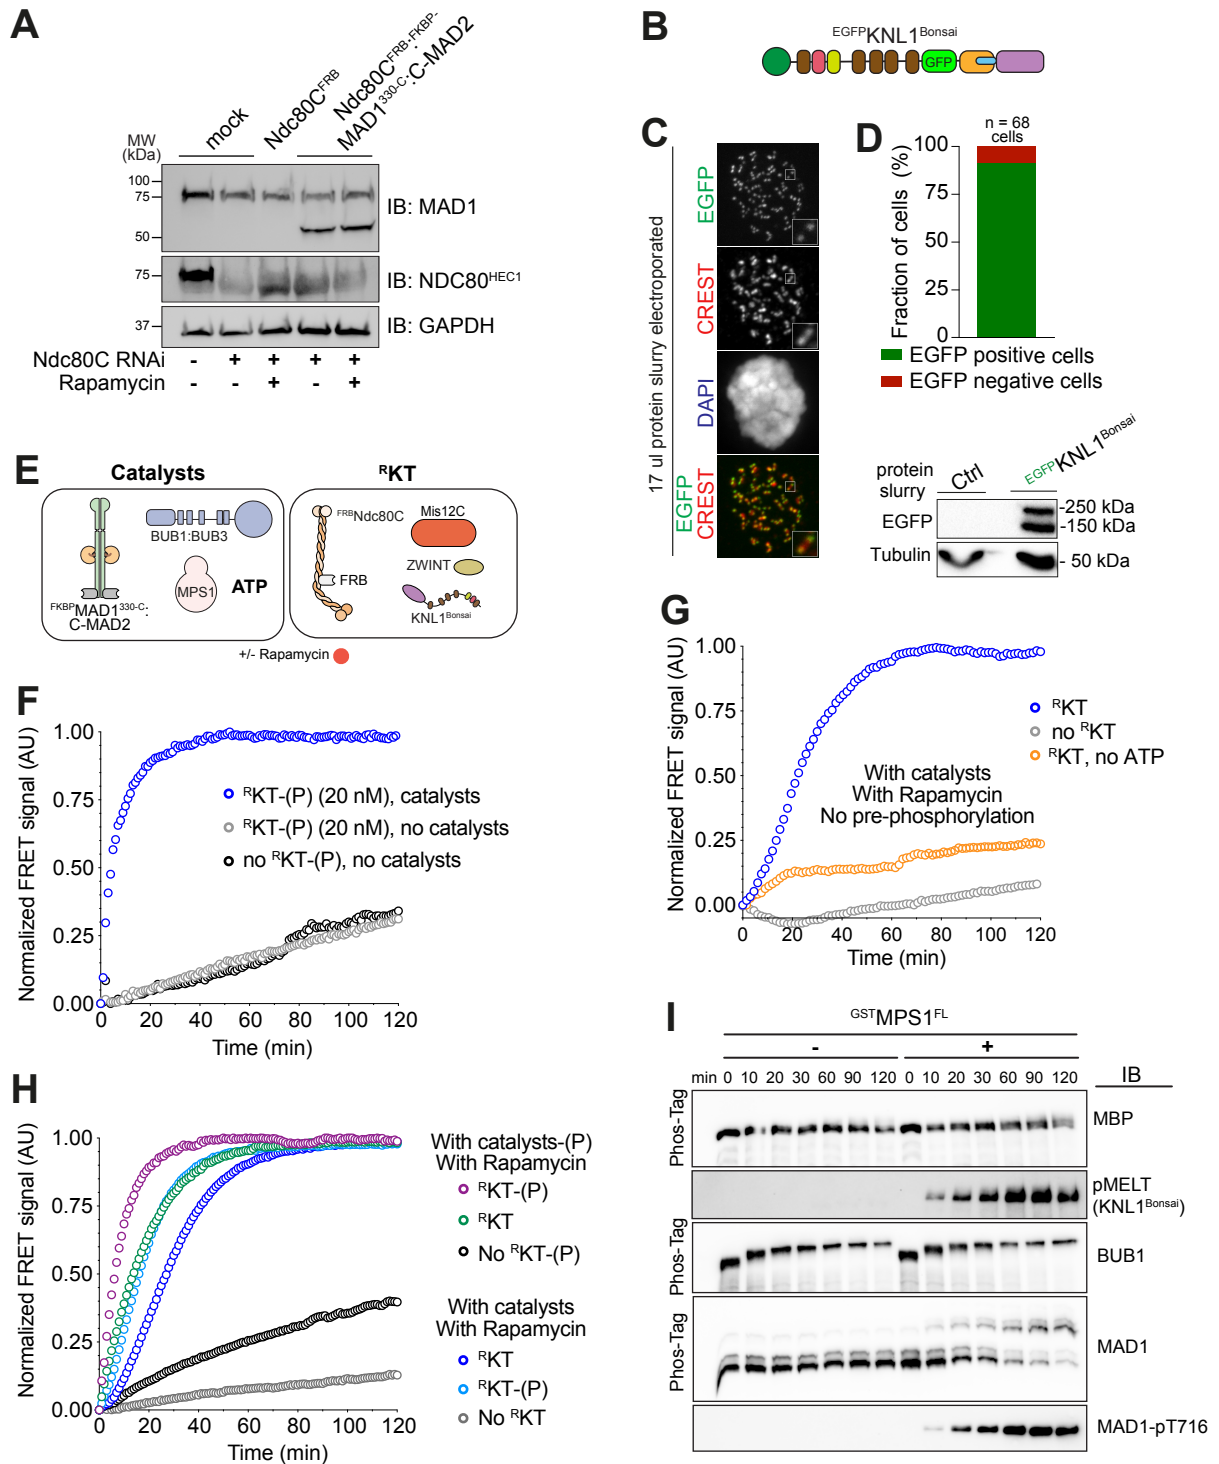

**Figure S1**

### Figure S1. *Further characterization of<sup>R</sup>KTs*

**A)** Western blots displaying controls for RNAi and electroporation experiments in [Figure 2C-F](#).

**B)** Scheme of EGFP-labelled KNL1<sup>Bonsai</sup> used in panel **C**.

**C)** Representative image of HeLa cells electroporated with GFP-KNL1<sup>Bonsai</sup> (at slurry concentration of 6  $\mu$ M). DAPI and CREST stain DNA and inner kinetochores, respectively. Scale bar: 5  $\mu$ M.

**D)** Quantification of electroporation efficiency with immunoblot from 50  $\mu$ g cleared mitotic lysate from HeLa cells electroporated with GFP-KNL1<sup>Bonsai</sup>. Tubulin is the loading control. The two bands in the anti-GFP blot represent EGFP-KNL1<sup>Bonsai</sup> and unfused EGFP-KNL1<sup>M5</sup>.

**E)** Scheme of proteins used in assays in panels F-H.

**F)** FRET curves for MCC sensor in presence of pre-phosphorylated catalysts, or in conditions where catalysts (grey), or both catalysts and kinetochores (black), were omitted. Catalytic components or kinetochores were prephosphorylated with MPS1 as indicated. The blue curve was normalized to its own maximum. The grey and black curves were normalized to maximum of the blue curve.

**G)** FRET assay monitoring MCC assembly with (blue curve, already shown in [Figure 4D](#)) or without (grey curve; already shown in [Figure 4D](#)) reconstituted <sup>R</sup>KTs, and in absence of ATP (orange). MAD1:MAD2, BUB1:BUB3 and <sup>R</sup>KT were not pre-phosphorylated with MPS1.

**H)** FRET assay monitoring rate of MCC formation with MPS1-pre-phosphorylated catalysts (20 nM MAD1:MAD2 and 40 nM BUB1:BUB3; purple, green and black curves) or not pre-phosphorylated catalysts (blue, light blue, grey curves). <sup>R</sup>KT, pre- or not pre-phosphorylated, were added where indicated. Purple, green, light blue and blue curves were normalized to their own maximum. The black and grey curve were normalized to maximum of green curve. Panels reporting time-dependent changes in FRET signal are from single measurements and representative of at least three independent technical replicates.

**I)** Western blots of phosphorylation targets and phosphorylated residues. Phos-Tag SDS-PAGE emphasizes changes in electrophoretic mobility upon phosphorylation. The kinase reaction was performed under standard conditions monitoring MCC assembly in the plate reader (20 nM <sup>R</sup>KT in, 20 nM MAD1:MAD2, 40 nM BUB1:BUB3, 50 nM MPS1, 100 nM CDC20, 200 nM Rapamycin, 2 mM ATP, 10 mM MgCl<sub>2</sub>), but in absence of fluorescent subunits (CFP-BUBR1 and MAD2<sup>TAMRA</sup>). Experiment repeated in triplicate.

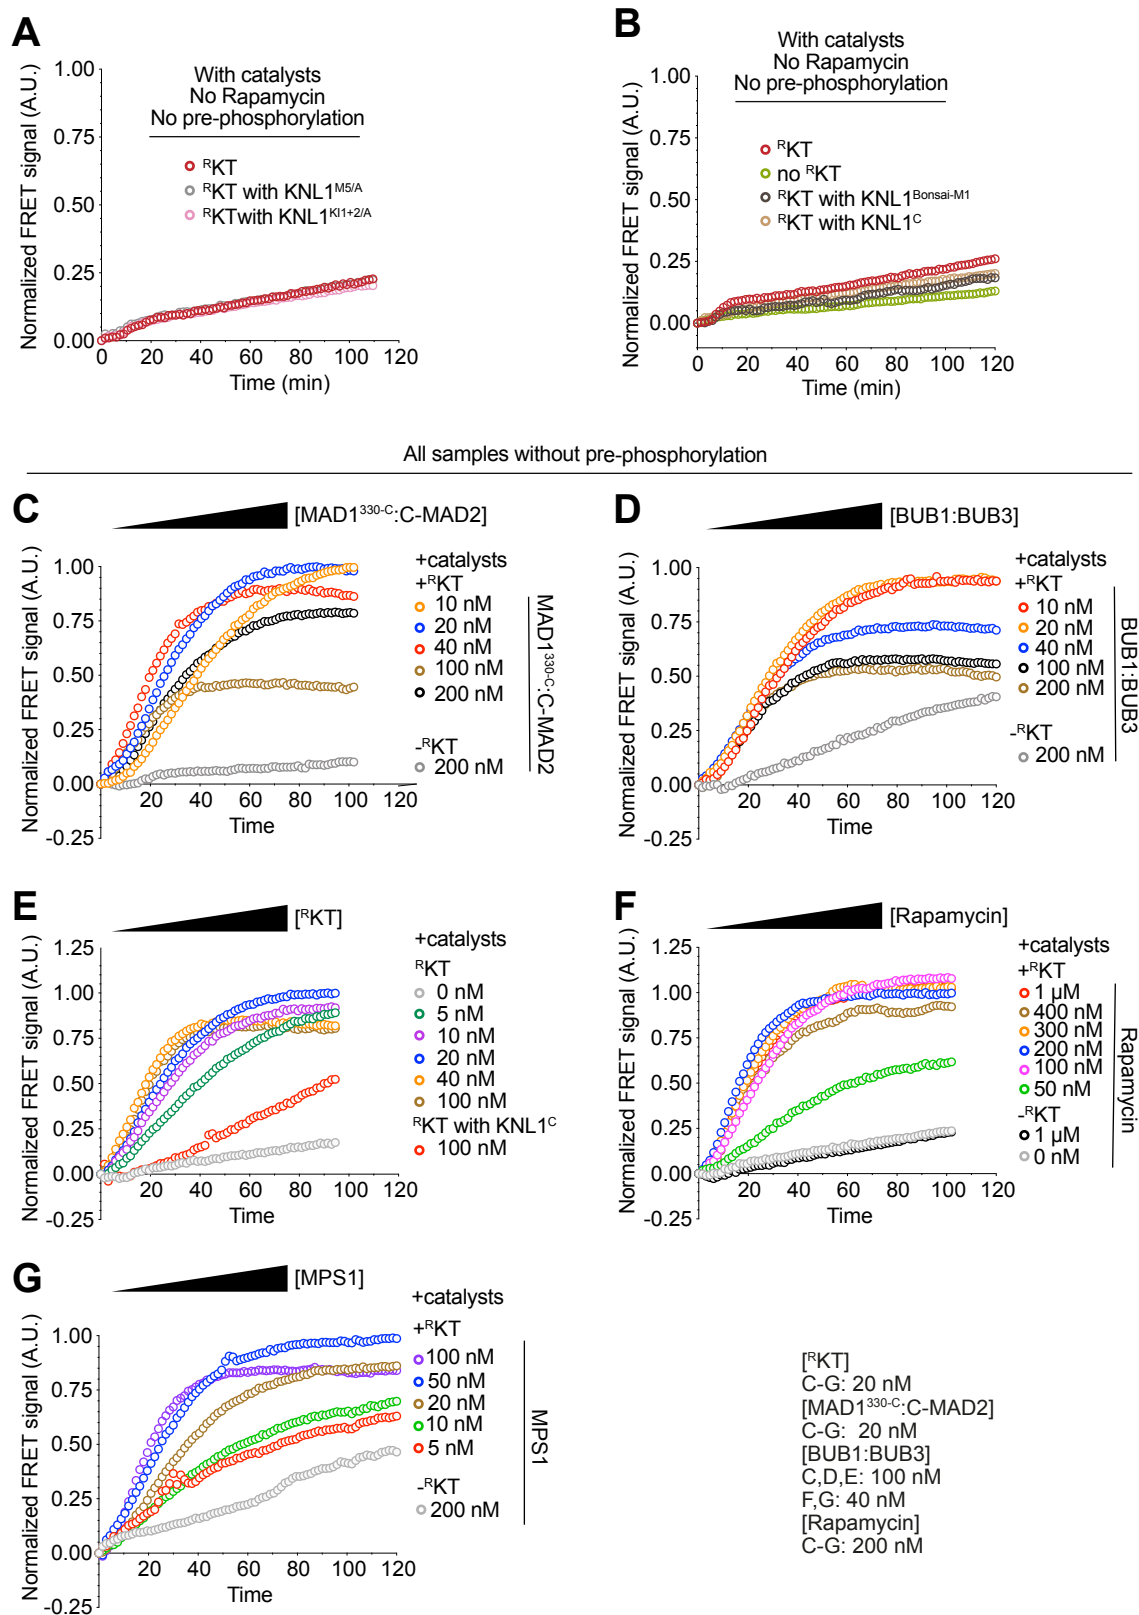

Figure S2

**Figure S2. Rate of MCC assembly under various conditions**

**A)** Additional controls for experiments with <sup>R</sup>KT performed in **Figure 5C**. FRET assay comparing the MCC catalytic assembly with wild-type <sup>R</sup>KT (maroon), <sup>R</sup>KT with Knl1<sup>KI1+2/Δ</sup> (where KI1 and KI2 motifs of KNL1 are mutated, pink) and <sup>R</sup>KT with Knl1<sup>M5-Δ</sup> (where five MELT motifs of KNL1 are mutated, grey) without Rapamycin.

**B)** Additional controls for experiments with <sup>R</sup>KT performed in **Figure 5D**. FRET assay comparing the MCC catalytic assembly with wild-type <sup>R</sup>KT (maroon), <sup>R</sup>KT with Knl1<sup>M1/Δ</sup> (where only first MELT motif is present, dark grey), <sup>R</sup>KT with Knl1<sup>C</sup> (where only C terminal of KNL1 is present light brown), and no <sup>R</sup>KT (light green) in the absence of Rapamycin.

**C-G)** Effect of titration of the indicated catalyst concentration, Rapamycin, and <sup>R</sup>KT on MCC assembly rate. Panels reporting time-dependent changes in FRET signal are from single measurements and representative of at least three independent technical replicates of the experiment.



**Figure S3. *CCAN does not contribute to catalytic assembly of MCC***

**A)** Scheme of GST pulldown assays. GST or <sup>GST</sup>CENP-C were incubated with CENP12 on GSH beads as bait. <sup>R</sup>KT was added as the prey.

**B)** SDS-PAGE of GSH based pulldown with the indicated baits and preys. <sup>GST</sup>CENP-C<sup>1-544</sup> (3 μM) as a bait with CENP11 (CENP-HIKM/CENP-LN/CENP-OPQUR) (4 μM) and <sup>R</sup>KT (6 μM) as prey.

**C)** FRET assay monitoring the rate of MCC formation in the presence of the indicated CCAN species and in the presence of catalysts and <sup>R</sup>KT. The blue and purple curves were normalized to their maximum. Fluorescence values of the other curves were normalized to the maximum value of the blue curve. Panels reporting time-dependent changes in FRET signal are from single measurements and representative of at least three independent technical replicates of the experiment.



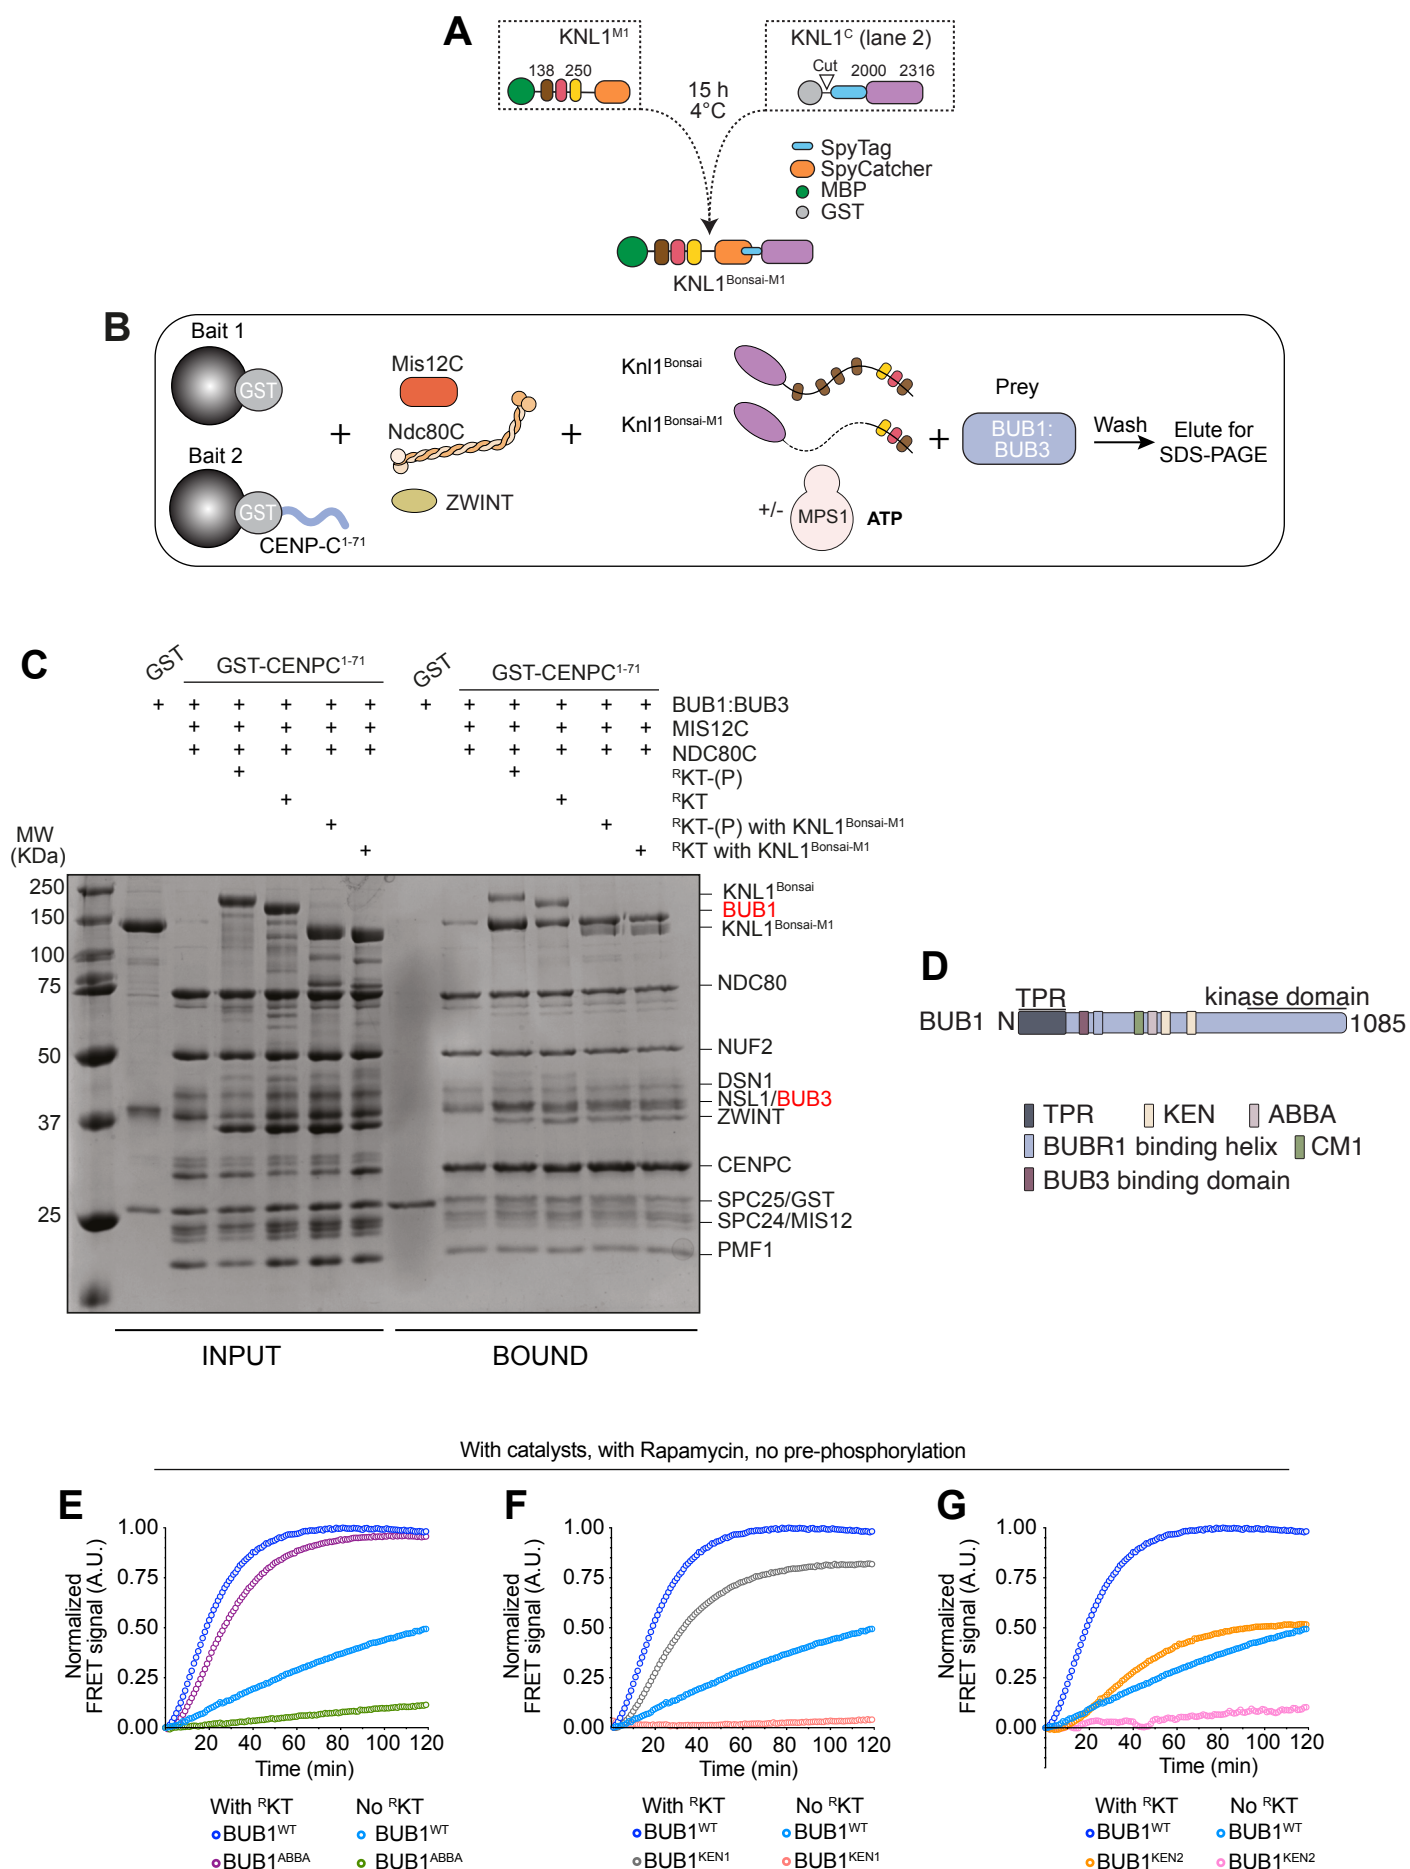

**Figure S4**

**Figure S4. Additional experiments with KNL1 and BUB1 variants**

**A)** Scheme for the assembly of KNL1<sup>Bonsai-M1</sup>.

**B)** Scheme for binding assays with <sup>R</sup>KT assembled with KNL1<sup>Bonsai</sup> or KNL1<sup>Bonsai-M1</sup>.

**C)** SDS-PAGE of BUB1 binding assays with <sup>R</sup>KT assembled with KNL1<sup>Bonsai</sup> or KNL1<sup>Bonsai-M1</sup>.

**D)** Scheme of BUB1 motifs and domains.

**E)** MCC FRET assay monitoring the assembly of MCC without pre-phosphorylation of the components by MPS1, in the presence of catalysts and Rapamycin with <sup>R</sup>KT (dark blue curve, also shown in panels **F** and **G**) and without <sup>R</sup>KT (light blue curve, also shown in panel **F** and **G**). The BUB1<sup>ABBA</sup> mutant was tested with (purple curve) and without <sup>R</sup>KT (green curve). Experiment repeated in triplicate.

**F)** MCC FRET assay monitoring the assembly of MCC without pre-phosphorylation of the components by MPS1, in the presence of catalysts and Rapamycin with <sup>R</sup>KT (dark blue curve, also shown in panels **E** and **G**) and without <sup>R</sup>KT (light blue curve, also shown in panel **E** and **G**). The BUB1<sup>KEN1</sup> mutant was tested with (grey curve) and without <sup>R</sup>KT (salmon curve). Experiment repeated in triplicate.

**G)** MCC FRET assay monitoring the assembly of MCC without pre-phosphorylation of the components by MPS1, in the presence of catalysts and Rapamycin with <sup>R</sup>KT (dark blue curve, also shown in panels **E** and **F**) and without <sup>R</sup>KT (light blue curve, also shown in panel **E** and **F**). The BUB1<sup>KEN2</sup> mutant was tested with (orange curve) and without <sup>R</sup>KT (pink curve). Experiment repeated in triplicate.
